# Supplementary material for: XatA, an AT-1 autotransporter important for the virulence of Xylella fastidiosa Temecula1
Source: PubMed Central journal article supplement (PMC3426408; doi:10.1002/mbo3.6), 2012-03

1

| <b>Table S1. Bacterial strains and plasmids used in this study</b> |                                                                                                                                                                                |                                                             |
|--------------------------------------------------------------------|--------------------------------------------------------------------------------------------------------------------------------------------------------------------------------|-------------------------------------------------------------|
| <b>Strains or plasmids</b>                                         | <b>Description</b>                                                                                                                                                             | <b>Source</b>                                               |
| <i>Xylella fastidiosa</i> subsp. <i>fastidiosa</i>                 |                                                                                                                                                                                |                                                             |
| Temecula1                                                          | Wild type, Pierce's disease strain                                                                                                                                             | (Guilhabert <i>et al.</i> , 2001)                           |
| TAM22                                                              | Temecula1, NS1::Cm <sup>r</sup>                                                                                                                                                | (Matsumoto <i>et al.</i> , 2009)                            |
| TAM103                                                             | Temecula1, <i>xatA3</i> ::Cm <sup>r</sup>                                                                                                                                      | This study                                                  |
| TAM103/pAM61                                                       | TAM103 with pAM61- Cm <sup>r</sup> , Gm <sup>r</sup>                                                                                                                           | This study                                                  |
| <i>Escherichia coli</i>                                            |                                                                                                                                                                                |                                                             |
| BL21(DE3)                                                          | F <sup>-</sup> <i>dcm ompT hsdS<sub>B</sub>(r<sub>B</sub><sup>-</sup> m<sub>B</sub><sup>-</sup>) gal (λDE3)</i>                                                                | Novagen                                                     |
| EAM1                                                               | DH5α derivative; Sp <sup>r</sup> St <sup>r</sup><br><i>attP<sub>HK022</sub>::(P<sub>LacO-1</sub> -PD1607)</i>                                                                  | (Matsumoto and Igo, 2010)                                   |
| DH5α                                                               | F <sup>-</sup> <i>endA1 recA1 gyrA96 thi-1 hsdR17(r<sub>K</sub><sup>-</sup> m<sub>K</sub><sup>+</sup>) relA1 supE44 Δ(lacZYA-argF)U169 Φ80lacZΔM15 deor phoA λ<sup>-</sup></i> | Lab collection                                              |
| TOP10                                                              | F <sup>-</sup> <i>mcrA Δ(mrr-hsdRMS-mcrBC) Φ80lacZΔM15 ΔlacX74 recA1 araD139 Δ(ara-leu)7697 galU galK rpsL (St<sup>r</sup>) endA1 nupG</i>                                     | Invitrogen                                                  |
| UT5600                                                             | F- <i>ara-14 leuB6 azi-6 lacY1 leu-6 proC14 tsx-67 entA403 trpE38 rfbD1 rpsL109 xyl-5 mtl-1 thi1 Δ(ompT-fepC266) ΔompP</i>                                                     | (Elish <i>et al.</i> , 1988; Kaufmann <i>et al.</i> , 1994) |
| Plasmids                                                           |                                                                                                                                                                                |                                                             |
| pAM34                                                              | <i>xatA</i> <sup>+</sup> (2.65 kb) in pCR-Blunt II-TOPO, Km <sup>r</sup>                                                                                                       | This study                                                  |
| pAM53                                                              | <i>xatA</i> passenger domain in pCR-Blunt II-TOPO, Km <sup>r</sup>                                                                                                             | This study                                                  |
| pAM54                                                              | <i>xatA</i> from pAM53 in pET-29b, Km <sup>r</sup>                                                                                                                             | This study                                                  |
| pAM61                                                              | <i>xatA</i> <sup>+</sup> (3.5 kb) in pBBR1MCS-5, Gm <sup>r</sup>                                                                                                               | This study                                                  |
| pAM109                                                             | <i>xatA3</i> ::Cm <sup>r</sup> in pCR-Blunt II-TOPO; Cm <sup>r</sup> , Km <sup>r</sup>                                                                                         | This study                                                  |
| pBBR1MCS-5                                                         | Broad-host range cloning vector, Gm <sup>r</sup>                                                                                                                               | (Kovach <i>et al.</i> , 1995)                               |
| pCR-Blunt II-TOPO                                                  | Blunt PCR cloning vector, Km <sup>r</sup>                                                                                                                                      | Invitrogen                                                  |
| pET-29b(+)                                                         | Overexpression vector, Km <sup>r</sup>                                                                                                                                         | Novagen                                                     |
| pLBT0528                                                           | <i>xatA</i> (3.5 kb) in pCR-Blunt II-TOPO                                                                                                                                      | This study                                                  |
| pRL1342                                                            | RSF1010 replicon; Cm <sup>r</sup> , Em <sup>r</sup>                                                                                                                            | (Wolk <i>et al.</i> , 2007)                                 |

2

3

4 **Table S2: Primers**

| Primer name                                                      | Primer sequence (5'→3')                 | Restriction Sites | Source or reference              |
|------------------------------------------------------------------|-----------------------------------------|-------------------|----------------------------------|
| For generating of <i>xatA</i> mutant and complementation         |                                         |                   |                                  |
| Cm-f                                                             | GGACTAGTCCAATCAGCGACACTGAATACGG         | SpeI              | (Matsumoto <i>et al.</i> , 2009) |
| Cm-r                                                             | GGACTAGTCCTCACTTATTCAGGCGTAGCAC         | SpeI              | (Matsumoto <i>et al.</i> , 2009) |
| PD0528F-Spe                                                      | CAA <u>ACTAGT</u> TACAAGAACATGACGTGACGC | SpeI              | This study                       |
| PD0528R-Spe                                                      | CAG <u>ACTAGT</u> AACAGCGCTATTGGGCGATT  | SpeI              | This study                       |
| PD0528_fwd                                                       | CGCCAACGTTTATTTCGAATTGCC                |                   | This study                       |
| PD0528_rev                                                       | GAGTAGTTGCGCAGCTTAGACTTTCATCC           |                   | This study                       |
| For generating the XatA passenger domain for antibody production |                                         |                   |                                  |
| PD0528-29                                                        | <u>CATATG</u> AACTCGCCATCCATATCGGAG     | NdeI              | This study                       |
| PD0528-470                                                       | <u>CTCGAG</u> CGCGTCTATCTGACAGTGTG      | XhoI              | This study                       |

5

6

7

8 **Figure S1.**9 **Phylogenetic tree of XatA homologs.**

10 Sequences exhibiting homology to the XatA passenger domain (amino acids 30-426) with E-  
 11 values above 2.00E-05 were aligned with MUSCLE ([http://www.biomedcentral.com/1471-](http://www.biomedcentral.com/1471-2105/5/113)  
 12 [2105/5/113](http://www.biomedcentral.com/1471-2105/5/113)) and visually screened in Jalview to remove redundancies and fragmentary  
 13 sequences. The resulting pool of sequences was used to generate 1000 maximum likelihood  
 14 bootstrapped phylogenetic trees using RAxML with the JTT substitution model  
 15 (<http://bioinformatics.oxfordjournals.org/content/22/21/2688.long>) and visualized using FigTree.  
 16 Numbers by nodes are bootstrap values. The *X. fastidiosa* Temecula1 homologs are in gray. The  
 17 followings proteins were used for the analysis: XatA orthologs [Xf Temecula-XatA  
 18 (NP\_778752.1), Xf M23-XatA (YP\_001829270.1), Xf M12-XatA (YP\_001775231.1), Xf  
 19 Dixon-XatA (ZP\_00651219.1), Xf Ann1-XatA (ZP\_00682978.1), Xf CVC-XF1265/XF1264  
 20 (composite protein generated from DNA sequence by removing a single nucleotide at position  
 21 1,220,709, which results in a protein of 807 amino acids.); XatB orthologs [Xf Temecula1-XatB  
 22 (NP\_779577.1), Xf Ann1-XatB (ZP\_00680532), Xf GB514-XatB (ADN62223.1), Xf CVC-  
 23 XatB (NP\_299628.2), Xf Dixon-XatB (ZP\_00652420.1)]; XatC orthologs [Xf Temecula1-  
 24 XatC (NP\_779013.2), Xf M23-XatC (YP\_001829549.1), Xf GB514-XatC (ADN63803.1), Xf  
 25 Ann1- XatC (ZP\_00680178.1), Xf CVC-XatC (NP\_299303.2), Xf Dixon-XatC  
 26 (ZP\_00652050.1), Xf CVC-XF2069 (NP\_299348.1)]; Other bacteria [NEIELOOT\_00780  
 27 (*Neisseria elongata* subsp. *glycolytica*; ZP\_06733955.1), NEIFL0001\_2154 (*Neisseria*  
 28 *flavescens* SK114; ZP\_04757153.1), PROSTU\_00583 (*Providencia stuartii* ATCC 25827;  
 29 ZP\_02958823.1), PFL\_2727 (*Pseudomonas fluorescens* Pf-5; YP\_259834.1), Rmar\_2382

- 30 (*Rhodothermus marinus* DSM 4252; YP\_003291648.1), AGROH133\_04441 (*Agrobacterium* sp.  
31 H13-3; YP\_004278026), CPn0796 (*Chlamydia pneumoniae* CWL029; NP\_224991.1)].

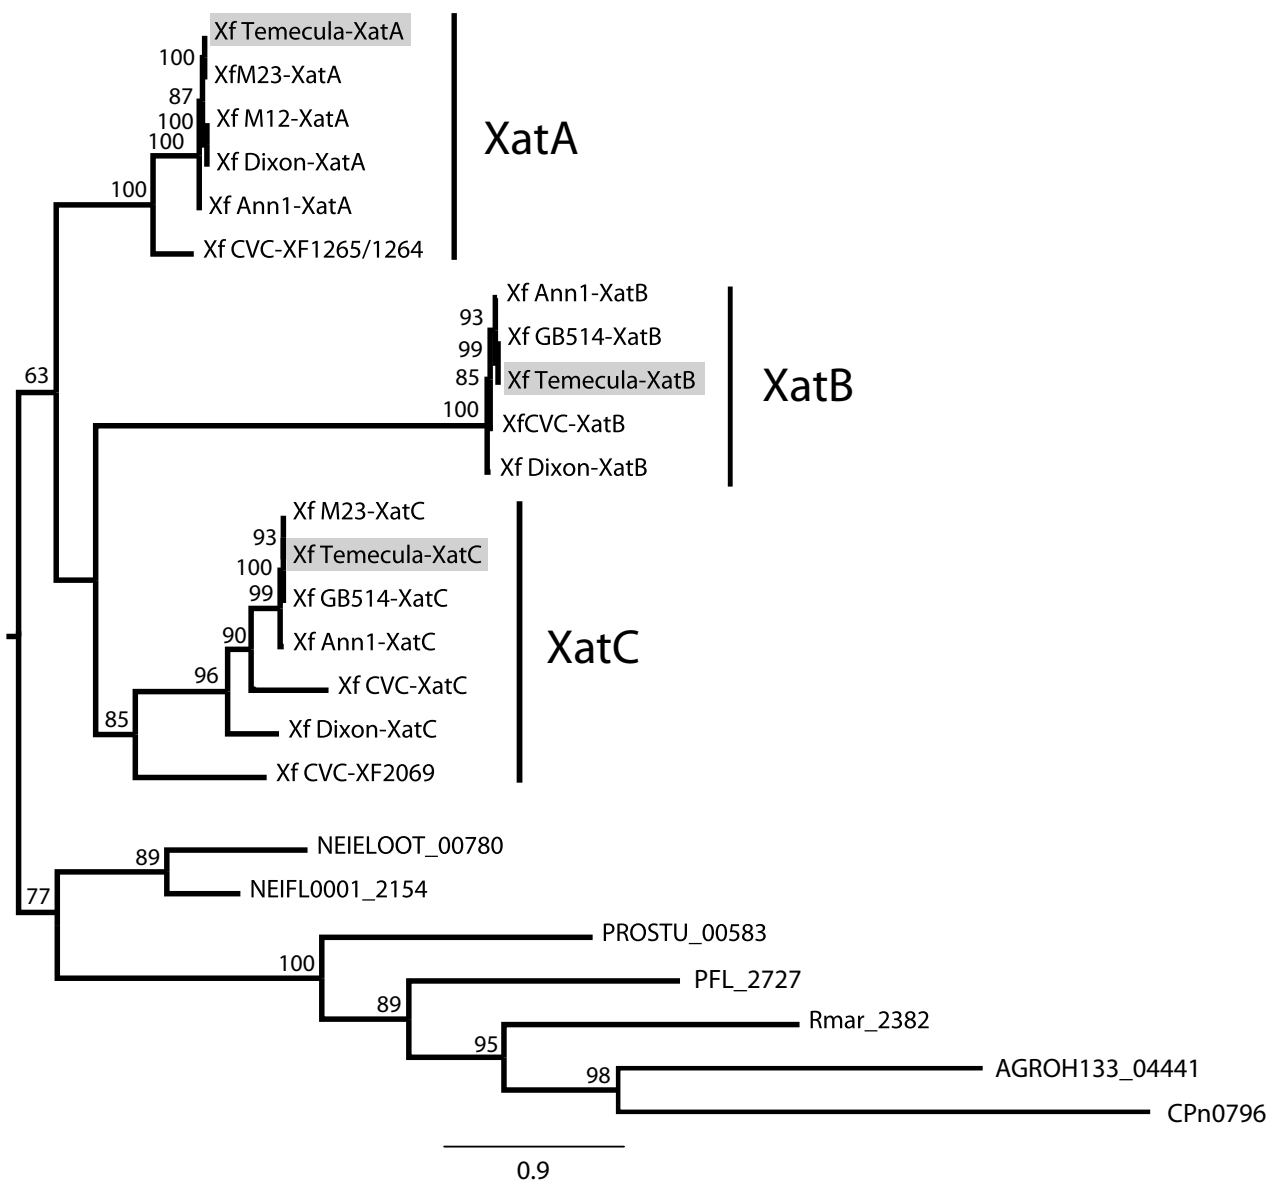

Supplement: mbo30001-0033-SD1.pdf [file mbo30001-0033-SD1.pdf]
